# Supplementary material
Source: HighWire-hosted journal article supplement (https://www.cfp.ca/highwire/filestream/30447/field_highwire_adjunct_files/0/Field_Note.pdf)
Supplement: Field_Note.pdf [file Field_Note.pdf]

Example Field Note and Review:

|                                                                                                                   |                                                                                                                                                                                                                                                                                                                           |                                                                                                                |
|-------------------------------------------------------------------------------------------------------------------|---------------------------------------------------------------------------------------------------------------------------------------------------------------------------------------------------------------------------------------------------------------------------------------------------------------------------|----------------------------------------------------------------------------------------------------------------|
| <b>Date of encounter</b><br>2016-02-02                                                                            | <b>Experience</b><br>KTI/Core Family Medicine/QFHT                                                                                                                                                                                                                                                                        | <b>Promoted reflection</b>  |
| <b>Resident:</b> Joe Residento                                                                                    | <b>Completed By:</b> Dr. Jane Griffiths                                                                                                                                                                                                                                                                                   |                                                                                                                |
| <b>Type of encounter/ situation:</b> 62 yo M Diabetes review                                                      | <b>Phase Observed:</b> Follow-up                                                                                                                                                                                                                                                                                          |                                                                                                                |
| <b>Direct Observation</b> - Yes                                                                                   | <b>level of performance chosen by preceptor</b><br>Requires minimal supervision                                                                                                                                                                                                                                           | <b>level of performance chosen by resident</b>                                                                 |
| <b>Skills Dimensions / CanMEDs Roles</b><br>Patient-centered Approach<br>Clinical Reasoning Skills<br>Selectivity | <b>Domains of Clinical Care</b><br>Care of Adults                                                                                                                                                                                                                                                                         | <b>Linked EPA</b><br>Care of the Adult with a Chronic Condition                                                |
| <b>Feedback</b>                                                                                                   |                                                                                                                                                                                                                                                                                                                           |                                                                                                                |
| <b>Continue (strengths):</b>                                                                                      | discussing the option of increasing his medication was a good idea and very patient-centered in this case                                                                                                                                                                                                                 |                                                                                                                |
| <b>Change (or do less):</b>                                                                                       | You may want to consider not being very rigid about guidelines interpretation, but apply them with the individual in mind. In this case I am happy with his HbgA1C 7.1, especially since he has worked so hard to get there. Insisting it be <7 may have undermined his feeling of success today.                         |                                                                                                                |
| <b>Consider (next steps):</b>                                                                                     | we talked about a 6/12 f/u in this case would not be best since you just increased his BP medication and todays BP was too high. In addition the Diabetes guidelines would recommend having him back at 3/12 for DM review. He should have his BP and his response to his med increase checked sooner. perhaps 3-4 weeks. |                                                                                                                |
| <b>This field note is: Not Flagged</b>                                                                            |                                                                                                                                                                                                                                                                                                                           |                                                                                                                |
| <b>Comments</b>                                                                                                   |                                                                                                                                                                                                                                                                                                                           |                                                                                                                |
| <b>Date</b>                                                                                                       | <b>Submitted By</b>                                                                                                                                                                                                                                                                                                       | <b>Status/Flag</b>                                                                                             |
| 2016-02-02                                                                                                        | Dr. Jane Griffiths                                                                                                                                                                                                                                                                                                        | Not Flagged                                                                                                    |
| <b>File a copy of this field note in one your personal folders.</b>                                               |                                                                                                                                                                                                                                                                                                                           |                                                                                                                |
| <input type="button" value="Please Choose"/>                                                                      | <input type="button" value="File Field Note"/>                                                                                                                                                                                                                                                                            |                                                                                                                |

|                                                                                   |                                                                                                                                                                                                                                                                                                                                                                                                                                                       |
|-----------------------------------------------------------------------------------|-------------------------------------------------------------------------------------------------------------------------------------------------------------------------------------------------------------------------------------------------------------------------------------------------------------------------------------------------------------------------------------------------------------------------------------------------------|
| Is the feedback timely?                                                           | Yes. This Field Note was written on the day of the encounter.                                                                                                                                                                                                                                                                                                                                                                                         |
| Are there narrative comments?                                                     | Yes.                                                                                                                                                                                                                                                                                                                                                                                                                                                  |
| Is the tone positive and/ or supportive?                                          | Yes.                                                                                                                                                                                                                                                                                                                                                                                                                                                  |
| Does the narrative describe behaviour in clear language?                          | Yes.                                                                                                                                                                                                                                                                                                                                                                                                                                                  |
| Does the narrative reinforce what has been done well?                             | Yes. Under the 'strengths' section.                                                                                                                                                                                                                                                                                                                                                                                                                   |
| Does the narrative identify areas to improve?                                     | This Field Note highlights a difference in approach with a reminder not to apply guidelines in a rigid way, but to consider the application of those guidelines on an individual level                                                                                                                                                                                                                                                                |
| Does the narrative include specific strategies for improvement?                   | This Field Note clearly states that a shorter follow up than the resident was suggesting is necessary and why that is so.                                                                                                                                                                                                                                                                                                                             |
| Does the feedback relate to specific standards?                                   | Yes. When viewing this on-line, a short description specific to the EPA (Care of Adults with a Chronic Condition), the phase of the clinical encounter (follow up) and the level of performance chosen (requires minimal supervision) is available when mousing over the 'level of performance' section. This is not visible in this static view in this example.                                                                                     |
| Is there congruence between the learner level and the sophistication of feedback? | This is difficult to tell unless you are the learner or the preceptor. Ultimately, this documentation of feedback often represents a nuanced and tailored verbal feedback. Joe Residento is a PGY1 resident and this feedback is about some fairly basic issues and he was considered by the preceptor to be requiring minimal supervision. Hopefully this feedback will support him functioning at an even higher level on the next similar occasion |
